# Supplementary material for: Optimization of Microwave-Assisted Water Extraction to Obtain High Value-Added Compounds from Exhausted Olive Pomace in a Biorefinery Context
Source: MDPI journal article supplement (doi:10.3390/foods11142002), 2022-07-06
Supplement: s1 [file s1]

Article

# Optimization of Microwave-Assisted Water Extraction to Obtain High Value-Added Compounds from Exhausted Olive Pomace in a Biorefinery Context

Irene Gómez-Cruz <sup>1,2</sup>, María del Mar Contreras <sup>1,2,\*</sup>, Inmaculada Romero <sup>1,2</sup> and Eulogio Castro <sup>1,2</sup>

<sup>1</sup> Department of Chemical, Environmental and Materials Engineering, Universidad de Jaén, Campus Las Lagunillas, S/N, 23071 Jaén, Spain; igcruz@ujaen.es (I.G.-C.); iromero@ujaen.es (I.R.); ecastro@ujaen.es (E.C.)

<sup>2</sup> Centre for Advanced Studies in Earth Sciences, Energy and Environment (CEACTEMA), Universidad de Jaén, Campus Las Lagunillas, S/N, 23071 Jaén, Spain

\* Correspondence: mcgamez@ujaen.es

## Supplementary materials: 1 Figure and 3 Tables

**Citation:** Gómez-Cruz, I.; Contreras, M.d.M.; Romero, I.; Castro, E. Optimization of Microwave-Assisted Water Extraction to Obtain High Value-Added Compounds from Exhausted Olive Pomace in a Biorefinery Context. *Foods* **2022**, *11*, 2002. <https://doi.org/10.3390/foods11142002>

Academic Editor: Antonello Santini

Received: 24 May 2022

Accepted: 4 July 2022

Published: 6 July 2022

**Publisher's Note:** MDPI stays neutral with regard to jurisdictional claims in published maps and institutional affiliations.

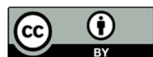

**Copyright:** © 2022 by the authors. Licensee MDPI, Basel, Switzerland. This article is an open access article distributed under the terms and conditions of the Creative Commons Attribution (CC BY) license (<https://creativecommons.org/licenses/by/4.0/>).

## Figures

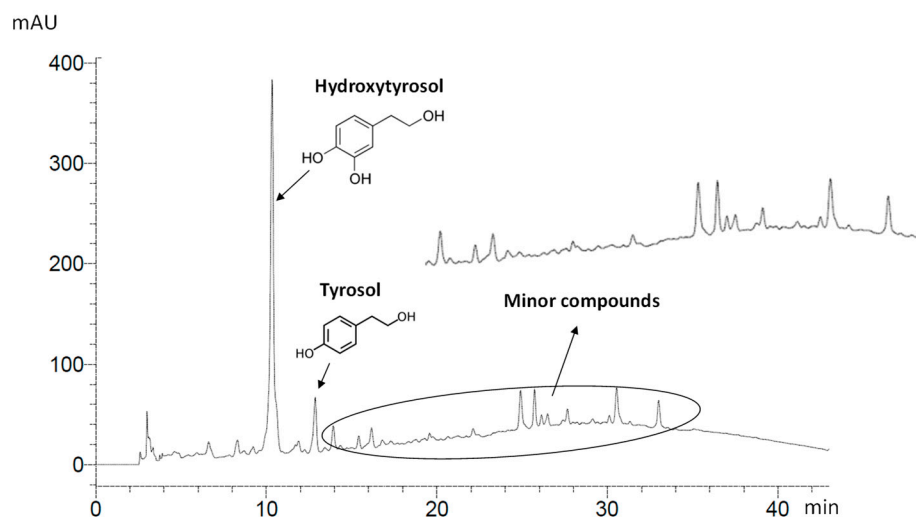

**Figure S1.** HPLC chromatogram at 280 nm of the aqueous extract of extracted olive pomace obtained by microwave-assisted water extraction at optimal conditions (12%, w/v, 100 °C, and 16 min).

## Tables

**Table S1.** Retention time,  $m/z$  of the molecular ion and fragmentation pattern of the compounds characterized in the aqueous extract from exhausted olive pomace obtained by microwave-assisted water extraction at optimal conditions.

| N°                         | RT<br>(min) | [M-H] <sup>-</sup><br>( $m/z$ ) | Fragments<br>( $m/z$ )            | Compound                                            |
|----------------------------|-------------|---------------------------------|-----------------------------------|-----------------------------------------------------|
| Hydroxytyrosol derivatives |             |                                 |                                   |                                                     |
| 1                          | 1.1         | 153                             | 123                               | Hydroxytyrosol <sup>1</sup>                         |
| 2                          | 1.2         | 315                             | 153, 135, 123                     | Hydroxytyrosol glucoside                            |
| 3                          | 1.7         | 461                             | 315, 161, 135                     | Verbascoside                                        |
| 4                          | 1.9         | 299                             | 179, 161, 119, 101                | Tyrosol glucoside                                   |
| 5                          | 3.0         | 461                             | 299, 179, 161                     | Verbascoside isomer                                 |
| 7                          | 6.5         | 195                             | 153, 151, 59                      | Hydroxytyrosol acetate                              |
| 8                          | 9.3         | 483                             | 347, 123                          | Oleacein derivative (+ hexose + H <sub>2</sub> )    |
| 10                         | 9.9         | 543                             | 513, 377, 357, 313                | Dihydro oleuropein                                  |
| 11                         | 10.1        | 623                             | 461, 315                          | Verbascoside                                        |
| 13                         | 10.3        | 701                             | 539, 437, 377, 307, 275           | Oleuropein hexoside isomer 1                        |
| 16                         | 10.7        | 335                             | 317, 199, 153                     | Hydroxy oleacein isomer 1                           |
| 17                         | 10.8        | 701                             | 539, 377, 307, 275                | Oleuropein hexoside isomer 2                        |
| 18                         | 10.9        | 623                             | 461                               | Isoverbascoside                                     |
| 19                         | 11.0        | 335                             | 317, 199, 153, 111                | Hydroxy oleacein isomer 2                           |
| 20                         | 11.3        | 541                             | 361, 225, 181                     | Oleuropein derivative (+H <sub>2</sub> )            |
| 21                         | 11.5        | 539                             | 403, 223                          | Oleuropein isomer 1                                 |
| 23                         | 11.9        | 539                             | 403, 377, 307, 275, 223           | Oleuropein <sup>1</sup>                             |
| 24                         | 11.9        | 701                             | 377, 307, 275                     | Oleuropein hexoside isomer 3                        |
| 25                         | 12.5        | 539                             | 377, 307, 275, 223                | Oleuropein isomer 2                                 |
| 26                         | 12.9        | 539                             | 403, 377, 307, 275, 223           | Oleuropein isomer 3                                 |
| 27                         | 13.0        | 319                             | 183, 181, 153, 111                | 3,4-DHPEA-EDA <sup>2</sup> or oleacein              |
| 29                         | 13.6        | 523                             | 361, 291, 259, 223                | Ligustroside                                        |
| Other phenolic compounds   |             |                                 |                                   |                                                     |
| 6                          | 6.2         | 137                             | Not fragmented                    | 3-Hydroxybenzoic acid                               |
| 9                          | 9.7         | 463                             | 347, 301                          | Quercetin glucoside                                 |
| 12                         | 10.3        | 447                             | 285                               | Luteolin 7- <i>O</i> -glucoside                     |
| 14                         | 10.3        | 593                             | 285                               | Luteolin <i>O</i> -deoxyhexosyl-hexoside            |
| 15                         | 10.7        | 593                             | 447, 285                          | Luteolin <i>O</i> -deoxyhexoside <i>O</i> -hexoside |
| 22                         | 11.7        | 551                             | 507, 389, 341, 281, 251, 179, 161 | Caffeoyl-6'-secologanoside                          |
| 28                         | 13.0        | 535                             | 491, 389, 345, 265, 163           | <i>p</i> -Coumaroyl-6'-secologanoside               |
| Other compounds            |             |                                 |                                   |                                                     |
| a                          | 0.4         | 191                             | 111                               | Citric acid                                         |

|   |      |     |                         |                                                                       |
|---|------|-----|-------------------------|-----------------------------------------------------------------------|
| b | 0.5  | 191 |                         | Quinic acid                                                           |
| c | 0.5  | 181 | 163, 143, 131, 119, 113 | Mannitol                                                              |
| d | 0.8  | 393 | 375, 213, 151           | Unknown                                                               |
| e | 1.5  | 407 | 389, 375, 357, 313      | Acyclodihydroelenolic acid hexoside                                   |
| f | 2.2  | 553 | 491, 371, 181           | Unknown                                                               |
| g | 3.3  | 183 | 139                     | Decarboxymethylelenolic acid                                          |
| h | 4.0  | 389 | 345, 209, 165, 121      | Oleoside/Secologanoside                                               |
| i | 4.4  | 435 | 389, 313, 357, 161      | Acyclodihydroelenolic acid hexoside derivative (+CO)                  |
| j | 5.4  | 377 | 197, 153                | Elenolic acid derivative                                              |
| k | 5.8  | 389 | 357, 313                | Acyclodihydroelenolic acid hexoside derivative (-H <sub>2</sub> , -O) |
| l | 14.4 | 836 | 790.0                   | Unknown                                                               |
| m | 15.5 | 557 | 513, 345, 209           | 6'-O-[(2E)-2,6-Dimethyl-8-hydroxy-2-octenoyloxy]-secologanoside       |
| n | 16.7 | 329 | 311, 275, 201, 171      | Trihydroxyoctadecenoic acid                                           |
| ñ | 18.1 | 331 | 313, 295, 171           | Trihydroxyoctadecanoic acid                                           |
| o | 19.0 | 287 | 269                     | Dihydroxyhexadecanoic acid                                            |

<sup>1</sup>Compared with standards. <sup>2</sup>Oleacein or 3,4-DHPEA-EDA or decarboxymethyl oleuropein aglycone.

**Table S2.** Experimental values for the protein solubilized in the aqueous extracts obtained in the Box-Behnken design experiments.

| RUN | T (°C) | t (min) | C (%<br>w/v) | g BSA/L | mg BSA/g EOP |
|-----|--------|---------|--------------|---------|--------------|
| 1   | 70     | 4       | 3            | 0.40    | 12.37        |
| 2   | 40     | 22      | 3            | 0.19    | 5.76         |
| 3   | 70     | 40      | 15           | 1.52    | 9.43         |
| 4   | 70     | 22      | 9            | 1.68    | 17.43        |
| 5   | 70     | 22      | 9            | 1.68    | 17.50        |
| 6   | 100    | 22      | 3            | 0.51    | 15.76        |
| 7   | 40     | 40      | 9            | 1.31    | 13.57        |
| 8   | 70     | 22      | 9            | 1.16    | 12.00        |
| 9   | 40     | 4       | 9            | 1.19    | 12.38        |
| 10  | 70     | 22      | 9            | 1.30    | 13.53        |
| 11  | 100    | 40      | 9            | 1.29    | 13.39        |
| 12  | 70     | 4       | 15           | 2.03    | 12.64        |
| 13  | 100    | 4       | 9            | 1.58    | 16.47        |
| 14  | 70     | 22      | 9            | 1.69    | 17.59        |
| 15  | 70     | 40      | 3            | 0.35    | 10.72        |
| 16  | 100    | 22      | 15           | 2.56    | 15.89        |
| 17  | 40     | 22      | 15           | 2.02    | 12.52        |

**Table S3.** Statistical parameter values for the factors of the Box-Behnken design applied to the exhausted olive pomace (EOP) and in the response of the protein solubilized in the aqueous extracts obtained by microwave-assisted water extraction.

| Source         | Protein (g/L) |         | Protein (mg/g EOP) |         |
|----------------|---------------|---------|--------------------|---------|
|                | F-Ratio       | P-Value | F-Ratio            | P-Value |
| T: Temperature | 2.940         | 0.130   | 5.410              | 0.053   |
| t: Time        | 1.100         | 0.330   | 0.830              | 0.394   |
| C: Solids      | 86.020        | <0.0001 | 0.620              | 0.456   |
| TT             | 0.110         | 0.746   | 0.033              | 0.862   |
| Tt             | 0.640         | 0.451   | 0.660              | 0.442   |
| TC             | 0.190         | 0.680   | 1.600              | 0.247   |
| tt             | 2.660         | 0.147   | 1.240              | 0.302   |
| tC             | 0.820         | 0.395   | 0.088              | 0.775   |
| CC             | 3.370         | 0.109   | 5.130              | 0.058   |
